# Supplementary material for: Genome Analysis of Two Bacterial Strains Isolated from Diseased Freshwater Sponge Reveals the Probable Cause of Its Joint Domination in Microbial Community
Source: Preprints.org preprint supplement (doi:10.20944/preprints202009.0144.v1), 2020-09-06
Supplement: Supplementary file 1 [file Table S1 Violacein production genes localization into Janthinobacterium sp. SLB01 genome.docx]

**Table S1.** Violacein production genes localization into *Janthinobacterium* sp. SLB01 genome

| Gene name | Locus tag | begin | end | strand | Length, bp |
| --- | --- | --- | --- | --- | --- |
| vioA | F3B38_RS17235 | 1353472 | 1354779 | + | 1308 |
| vioB | F3B38_RS17240 | 1354776 | 1357796 | + | 3021 |
| vioC | F3B38_RS17245 | 1357798 | 1359087 | + | 1290 |
| vioD | F3B38_RS17250 | 1359087 | 1360205 | + | 1119 |
| vioE | F3B38_RS17255 | 1360216 | 1360216 | + | 582 |
