# Supplementary material for: Genome Analysis of Two Bacterial Strains Isolated from Diseased Freshwater Sponge Reveals the Probable Cause of Its Joint Domination in Microbial Community
Source: Preprints.org preprint supplement (doi:10.20944/preprints202009.0144.v1), 2020-09-06
Supplement: Supplementary file 3 [file Table S3 Carbon sources metabolism.docx]

**Table S3. SIB Carbon sources metabolism subsystem composition into Janthinobacterium sp. SLB01 and Flavobacterium sp. SLB02 genomes**

| Carbon source group | Subsystem | *Subsystem gene loci for*  *Janthinobacterium* sp. SLB01 | *Subsystem gene loci for*  *Flavobacterium* sp. SLB02 |
| --- | --- | --- | --- |
| Central carbohydrate metabolism  (74/54) | TCA Cycle (15/0) | F3B38_21755*  Citrate synthase (si)  F3B38_21805  Aconitate hydratase  F3B38_21730  2-oxoglutarate dehydrogenase E1 component  F3B38_21725  Dihydrolipoamide succinyltransferase component (E2) of 2-oxoglutarate dehydrogenase complex  F3B38_21715  Dihydrolipoamide dehydrogenase of 2-oxoglutarate dehydrogenase  F3B38_00435  Dihydrolipoamide dehydrogenase  **F3B38_26675**  Succinyl-CoA ligase [ADP-forming] alpha chain  F3B38_26680  Succinyl-CoA ligase [ADP-forming] beta chain  F3B38_06840  Fumarate hydratase class I, aerobic  F3B38_07520  Fumarate hydratase class II  F3B38_21790  Malate dehydrogenase  F3B38_25650  Malate:quinone oxidoreductase  F3B38_08570  Isocitrate dehydrogenase  F3B38_17225  Isocitrate dehydrogenase [NADP]  F3B38_23935  Dihydrolipoamide dehydrogenase of pyruvate dehydrogenase complex |  |
| Pentose phosphate pathway (0/9) |  | GIY83_17730*  Ribulose-phosphate 3-epimerase  GIY83_19305  Transketolase  GIY83_24600  Transketolase, C-terminal section  GIY83_24605  Transketolase, N-terminal section  GIY83_19300  Transaldolase  GIY83_03155  Transaldolase  GIY83_07110  Transaldolase  GIY83_19205  Ribose-phosphate pyrophosphokinase  GIY83_21110  Ribose-phosphate pyrophosphokinase |
| Di- and oligosaccharides (3/14) | Sucrose utilization (0/2) |  | GIY83_05790  Fructokinase  GIY83_10050  Sucrose-6-phosphate hydrolase |
| Organic acids (19/3) | Methylcitrate cycle (7/0) | F3B38_08615  Propionate catabolism operon regulatory protein PrpR  F3B38_15375  2-methylcitrate synthase  F3B38_18875  Propionate--CoA ligase  F3B38_18890  2-methylaconitate isomerase  F3B38_18900  2-methylcitrate synthase  F3B38_18905  Methylisocitrate lyase  F3B38_21805  Aconitate hydratase |  |
| Propionate-CoA to Succinate Module (7/0) | Same except F3B38_08615 |  |
| Lactose and Galactose Uptake and Utilization (0/8) |  | GIY83_09355  Aldose 1-epimerase  GIY83_10655  Aldose 1-epimerase  GIY83_19225  Aldose 1-epimerase  GIY83_19315  Aldose 1-epimerase  GIY83_19320  Galactokinase  GIY83_19325  Galactose-1-phosphate uridylyltransferase  GIY83_16220  UDP-glucose 4-epimerase  GIY83_23050  UDP-glucose 4-epimerase |
| Fermentation (37/24) | Mixed acid (0/7) |  | GIY83_17280  pyruvate formate lyase-activating protein  GIY83_17285  formate C-acetyltransferase  GIY83_11695  phosphate acetyltransferase  GIY83_11690  acetate/propionate family kinase  GIY83_10940  Cinnamyl alcohol dehydrogenase/reductase  GIY83_07850 phosphoenolpyruvate carboxylase  GIY83_15085  D-lactate dehydrogenase |
| Polysaccharides (0/4) | Glycogen metabolism (0/4) |  | GIY83_07355  glucose-1-phosphate adenylyltransferase  GIY83_07350  Glycogen synthase, ADP-glucose transglucosylase  GIY83_07360  1,4-alpha-glucan (glycogen) branching enzyme, GH-13-type  GIY83_07365  DUF4968 domain-containing protein |
| Monosaccharides (37/35) | 2-Ketogluconate Utilization (4/0) | F3B38_18135  2-ketogluconate utilization repressor PtxS  F3B38_18110  Epimerase KguE  F3B38_18105  2-ketogluconate kinase  F3B38_18100  2-ketogluconate 6-phosphate reductase |  |
| L-Arabinose utilization (0/9) |  | GIY83_19255  family 43 glycosylhydrolase  GIY83_19265  family 43 glycosylhydrolase  GIY83_19270  family 43 glycosylhydrolase  GIY83_19280  family 43 glycosylhydrolase  GIY83_19240  Ribulokinase  GIY83_19230  L-arabinose isomerase  GIY83_19235  L-ribulose-5-phosphate 4-epimerase AraD  GIY83_07080  MFS transporter  GIY83_23865  Protein AraJ precursor |
